# Supplementary material for: Iodine and bromine speciation in snow and the effect of orographically induced precipitation
Source: Copernicus journal article supplement (doi:10.5194/acp-7-2661-2007), 2007-05-21
Supplement: Supplementary file 1 [file supplement-tables.doc]

Sup. Table 1: Total iodine, iodide and organically bound iodine in snow samples from the northern Black Forest. All concentrations in nmol/l.

| Sample location | Date | Altitude  (masl) | Total I | I- | IO3- | Organo-I | Unknown peak 1  Ret. 5.4 mins. | Unknown peak 2  Ret. ca 6.8 mins | Na  µmol |
| --- | --- | --- | --- | --- | --- | --- | --- | --- | --- |
| Ottenhöfen  N 48º34’06.6’’  E 008º09’42.0’’ | 11.02.06 | 326 | 29.5 | 11.4 | - | 18 | 1.3 | 2.6 | 87 |
| Seebach  N 48º34’44.1’’  E 008º10’13.4’’ | 11.02.06 | 400 | 38.0 | 9.1 | - | 28.8 | 1.5 | 3.0 | 65 |
| Oberseebach  N 48º34’43.7’’  E 008º10’54.7’’ | 11.02.06 | 478 | 37.3 | 9.4 | - | 27.9 | 0.9 | 2.9 | 50 |
| Elsa Weg 1  N 48º34’59’’  E 008º10’54.5’’ | 11.02.06 | 560 | 33.5 | 8.7 | - | 24.8 | 1.3 | 3.5 | 47 |
| Elsa Weg 2  N 48º35’03.9’’  E 008º10’41.7’’ | 11.02.06 | 597 | 33.3 | 9.8 | - | 23.5 | 1.2 | 2.8 | 48 |
| Elsa Weg 3  N 48º35’13.2’’  E 008º10’29’’ | 11.02.06 | 614 | 32.3 | 9.5 | - | 22.9 | 1.1 | 2.7 | 47 |
| Elsa Weg 4  N 48º35’21.8’’  E 008º10’47.1’’ | 12.02.06 | 718 | 18.6 | 6.1 | - | 12.5 | 0.6 | 1.7 | 27 |
| Elsa Weg 6  N 48º35’19.3’’  E 008º11’24.7’ | 12.02.06 | 796 | 19.9 | 6.2 | - | 13.6 | 0.7 | 2.0 | 23 |
| Elsa Weg 7  N 48º35’39’’  E 008º11’24.3’ | 12.02.06 | 934 | 18.1 | 5.8 | - | 12.4 | 0.6 | 0.8 | 37 |
| Mummelsee  N 48º35’52’’  E 008º12’08’ | 12.02.06 | 1036 | 16.4 | 5.1 | - | 11.3 | 0.4 | 0.6 | 21 |
| Hornisgrinde  N 48º36’05.2’’  E 008º12’03.2’ | 12.02.06 | 1164 | 13.0 | 3.9 | - | 9.1 | 0.3 | 0.6 | 21 |
| Mummelsee | 26.01.06 | 1036 | 13.5 | 6.4 | - | 7.1 |  | 0.2 |  |
| Mummelsee | 26.01.06 | 1036 | 15.4 | 7.2 | - | 8.1 |  | 0.6 |  |
| Mummelsee | 26.01.06 | 1036 | 13.5 | 5.3 | - | 8.2 |  | 0.4 |  |
| Mummelsee | 26.01.06 | 1036 | 13.7 | 6.8 | - | 6.9 |  |  |  |
| Elsa Weg 6  N 48º35’19.3’’  E 008º11’24.7’ | 14/4/06 | 796 | 1.6 | 0.7 | - | 0.9 |  | 0.4 |  |
| Elsa Weg 7  N 48º35’39’’  E 008º11’24.3’ | 14/4/06 | 934 | 1.4 | 0.9 | 0.23 | 0.3 |  | 0.5 |  |
| Mummelsee  N 48º35’52’’  E 008º12’08’ | 14/4/06 | 1036 | 4.9 | 2 | 0.4 | 2.4 |  | 1.1 |  |
| Hornisgrinde  N 48º36’05.2’’  E 008º12’03.2’ | 14/4/06 | 1164 | 2.4 | 1.1 |  | 1.3 |  | 0.5 |  |

Sup. Table 2: Total bromine, bromide and organically bound bromine in snow samples from the northern Black Forest. All concentrations in nmol/l.

| Sample location | Date | Altitude  (masl) | Total Br | Br- | Organo-Br | % org-Br |
| --- | --- | --- | --- | --- | --- | --- |
| Ottenhöfen  N 48º34’06.6’’  E 008º09’42.0’’ | 11.02.06 | 326 | 114.5 | 93.4 | 21.2 | 18 |
| Seebach  N 48º34’44.1’’  E 008º10’13.4’’ | 11.02.06 | 400 | 128.5 | 92.9 | 35.7 | 27 |
| Oberseebach  N 48º34’43.7’’  E 008º10’54.7’’ | 11.02.06 | 478 | 116.4 | 79.7 | 36.7 | 31 |
| Elsa Weg 1  N 48º34’59’’  E 008º10’54.5’’ | 11.02.06 | 560 | 99.9 | 78.0 | 21.9 | 22 |
| Elsa Weg 2  N 48º35’03.9’’  E 008º10’41.7’’ | 11.02.06 | 597 | 104.3 | 77.6 | 26.7 | 25 |
| Elsa Weg 3  N 48º35’13.2’’  E 008º10’29’’ | 11.02.06 | 614 | 106.8 | 77.5 | 29.3 | 27 |
| Elsa Weg 4  N 48º35’21.8’’  E 008º10’47.1’’ | 12.02.06 | 718 | 64.1 | 47.1 | 17.0 | 26 |
| Elsa Weg 6  N 48º35’19.3’’  E 008º11’24.7’ | 12.02.06 | 796 | 58.6 | 47.9 | 10.6 | 18 |
| Elsa Weg 7  N 48º35’39’’  E 008º11’24.3’ | 12.02.06 | 934 | 62.8 | 51.8 | 11.0 | 17 |
| Mummelsee  N 48º35’52’’  E 008º12’08’ | 12.02.06 | 1036 | 47.6 | 37.4 | 10.1 | 21 |
| Hornisgrinde  N 48º36’05.2’’  E 008º12’03.2’ | 12.02.06 | 1164 | 38.7 | 28.2 | 10.5 | 27 |
| Mummelsee | 26.01.06 | 1036 | 55.2 | 35.4 | 19.8 | 36 |
| Mummelsee | 26.01.06 | 1036 | 91.0 | 63.7 | 27.3 | 30 |
| Mummelsee | 26.01.06 | 1036 | 62.8 | 45.1 | 17.8 | 28 |
| Mummelsee | 26.01.06 | 1036 | 64.2 | 43.3 | 20.5 | 32 |
| Elsa Weg 6  N 48º35’19.3’’  E 008º11’24.7’ | 14/4/06 | 796 | 114.5 | 93.4 | 21.2 | 30 |
| Elsa Weg 7  N 48º35’39’’  E 008º11’24.3’ | 14/4/06 | 934 | 128.5 | 92.9 | 35.7 | 29 |
| Mummelsee  N 48º35’52’’  E 008º12’08’ | 14/4/06 | 1036 | 116.4 | 79.7 | 36.7 | 30 |
| Hornisgrinde  N 48º36’05.2’’  E 008º12’03.2’ | 14/4/06 | 1164 | 99.9 | 78.0 | 21.9 | 37 |
|  |  |  |  |  |  |  |

Sup. Table 3: Metal concentrations in snow from the northern Black Forest.

| **Sample location** | **Date** | **Altitude**  (masl) | **Li**  nmol | **V**  nmol | **Mn**  nmol | **Co**  nmol | **Rb**  nmol | **Zn**  nmol | **As**  nmol | **Mo**  nmol | **Pb**  nmol | **Ba**  nmol | **Sb**  nmol | **U**  pmol |
| --- | --- | --- | --- | --- | --- | --- | --- | --- | --- | --- | --- | --- | --- | --- |
| Ottenhöfen  N 48º34’06.6’’  E 008º09’42.0’’ | 11.02.06 | 326 | 17.3 | 28.9 | 158.0 | 1.6 | 8.0 | 959 | 4.1 | 5.0 | 36.9 | 23.3 | 4.4 | 33.6 |
| Seebach  N 48º34’44.1’’  E 008º10’13.4’’ | 11.02.06 | 400 | 17.3 | 36.7 | 176.0 | 1.4 | 6.5 | 692 | 5.2 | 5.9 | 44.3 | 21.8 | 5.4 | 33.6 |
| Oberseebach  N 48º34’43.7’’  E 008º10’54.7’’ | 11.02.06 | 478 | 14.4 | 30.8 | 118.5 | 1.1 | 5.1 | 606 | 4.6 | 4.3 | 38.1 | 16.3 | 4.4 | 21.0 |
| Elsa Weg 1  N 48º34’59’’  E 008º10’54.5’’ | 11.02.06 | 560 | 14.4 | 33.0 | 114.7 | 1.0 | 4.9 | 637 | 4.0 | 4.9 | 43.0 | 16.0 | 4.6 | 25.2 |
| Elsa Weg 2  N 48º35’03.9’’  E 008º10’41.7’’ | 11.02.06 | 597 | 10.1 | 29.6 | 100.5 | 0.9 | 4.4 | 587 | 3.7 | 3.6 | 37.0 | 14.0 | 3.5 | 21.0 |
| Elsa Weg 3  N 48º35’13.2’’  E 008º10’29’’ | 11.02.06 | 614 | 14.4 | 29.8 | 111.6 | 1.0 | 4.9 | 613 | 4.8 | 4.3 | 40.2 | 16.7 | 4.1 | 21.0 |
| Elsa Weg 4  N 48º35’21.8’’  E 008º10’47.1’’ | 12.02.06 | 718 | 5.8 | 19.4 | 56.2 | 0.6 | 2.9 | 362 | 2.9 | 2.6 | 22.6 | 8.6 | 2.5 | 12.6 |
| Elsa Weg 6  N 48º35’19.3’’  E 008º11’24.7’ | 12.02.06 | 796 | 5.8 | 18.1 | 46.4 | 0.5 | 3.3 | 362 | 3.0 | 2.6 | 20.1 | 7.6 | 2.1 | 12.6 |
| Elsa Weg 7  N 48º35’39’’  E 008º11’24.3’ | 12.02.06 | 934 | 4.3 | 17.9 | 46.2 | 0.5 | 3.3 | 372 | 3.0 | 2.5 | 19.9 | 7.6 | 2.1 | 12.6 |
| Mummelsee  N 48º35’52’’  E 008º12’08’ | 12.02.06 | 1036 | 2.9 | 15.3 | 45.1 | 0.4 | 2.1 | 323 | 2.9 | 2.2 | 17.1 | 8.4 | 2.0 | 8.4 |
| Hornisgrinde  N 48º36’05.2’’  E 008º12’03.2’ | 12.02.06 | 1164 | 2.9 | 11.0 | 34.4 | 0.3 | 1.5 | 275 | 2.3 | 1.6 | 12.9 | 6.4 | 1.7 | 8.4 |

**Sup. Table 4 Correlations (Pearson) between iodine, bromine and metals.**
